# Supplementary material for: Long-term Bowel Dysfunction and Decline in Quality of Life Following Surgery for Colon Cancer: Call for Personalized Screening and Treatment
Source: PubMed Central journal article supplement (PMC9645552; doi:10.1097/dcr.0000000000002377), 2022-08-19
Supplement: dcr-65-1531-s003.pdf [file dcr-65-1531-s003.pdf]

## Supplemental Digital Content 2. Dropout analysis

|                                     | Responders<br>No. (%) | Non-responders <sup>a</sup><br>No. (%) | <i>p</i> value |
|-------------------------------------|-----------------------|----------------------------------------|----------------|
| <b>Overall</b>                      | 1124 (100.0)          | 527 (100.0)                            |                |
| Type of colectomy                   |                       |                                        |                |
| Right hemicolectomy                 | 673 (59.9)            | 297 (56.4)                             | 0.021*         |
| Left hemicolectomy                  | 167 (14.9)            | 64 (12.1)                              |                |
| Sigmoid colon resection             | 284 (25.3)            | 166 (31.5)                             |                |
| Men                                 | 594 (52.8)            | 235 (44.6)                             | 0.002**        |
| Age at surgery (years) <sup>b</sup> | 67.0 (62 – 75)        | 72.0 (64 – 78)                         | <0.001**       |
| Follow-up (months) <sup>b,c</sup>   | 55.0 (40 – 78)        | 61.0 (42 – 80)                         | 0.079          |
| ASA score at surgery                |                       |                                        |                |
| I                                   | 203 (18.7)            | 62 (12.1)                              | <0.001**       |
| II                                  | 671 (61.7)            | 279 (54.6)                             |                |
| III                                 | 206 (18.9)            | 164 (32.1)                             |                |
| IV                                  | 8 (0.7)               | 6 (1.2)                                |                |
| Previous abdominal surgery          | 330 (29.4)            | 178 (33.8)                             | 0.070          |
| Tumor stage (UICC)                  |                       |                                        |                |
| I                                   | 284 (25.4)            | 133 (25.4)                             | 0.466          |
| II                                  | 468 (41.9)            | 238 (45.5)                             |                |
| III                                 | 334 (29.9)            | 139 (26.6)                             |                |
| IV                                  | 31 (2.8)              | 13 (2.5)                               |                |

<sup>a</sup> The clinical data of the non-responders was obtained from the Dutch ColoRectal Audit (DCRA) registry.

<sup>b</sup> Values expressed as median (IQR)

<sup>c</sup> Follow-up since primary rectum or rectosigmoid cancer surgery

\* Statistical significance of  $p < 0.05$

\*\* Statistical significance of  $p < 0.005$

Abbreviations: ASA, American Society of Anesthesiologists; UICC, Union for International Cancer Control.
