# Supplementary material for: Long-term Bowel Dysfunction and Decline in Quality of Life Following Surgery for Colon Cancer: Call for Personalized Screening and Treatment
Source: PubMed Central journal article supplement (PMC9645552; doi:10.1097/dcr.0000000000002377), 2022-08-19
Supplement: dcr-65-1531-s004.pdf [file dcr-65-1531-s004.pdf]

**Supplemental Digital Content 3. Univariable and multivariable logistic regression analysis of constipation and fecal incontinence with left hemicolectomy as the reference category**

| Variables                | Constipation     |                |                            |                | Fecal incontinence |                |                            |                |
|--------------------------|------------------|----------------|----------------------------|----------------|--------------------|----------------|----------------------------|----------------|
|                          | Univariable      |                | Multivariable <sup>a</sup> |                | Univariable        |                | Multivariable <sup>b</sup> |                |
|                          | OR (95% CI)      | <i>p</i> value | OR (95% CI)                | <i>p</i> value | OR (95% CI)        | <i>p</i> value | OR (95% CI)                | <i>p</i> value |
| <b>Type of colectomy</b> |                  |                |                            |                |                    |                |                            |                |
| Left hemicolectomy       | Reference        |                | Reference                  |                | Reference          |                | Reference                  |                |
| Sigmoid colon resection  | 1.70 (1.08–2.67) | 0.021*         | 1.93 (1.12–3.35)           | 0.019*         | 0.72 (0.42–1.23)   | 0.231          | 0.67 (0.38–1.20)           | 0.177          |

<sup>a</sup> The same variables were used as for the multivariable model of constipation with right hemicolectomy as the reference category (see Supplementary Digital Content 3): sex, age at surgery, follow-up, ASA score at surgery, previous lower abdominal surgery, previous upper abdominal surgery, smoking, surgical approach, and type of anastomosis.

<sup>b</sup> The same variables were used as for the multivariable model of fecal incontinence with right hemicolectomy as the reference category (see Supplementary Digital Content 3): sex, age at surgery, follow-up, Charlson comorbidity index at surgery, smoking, radiotherapy, setting, and temporary stoma.

\* Statistical significance of  $p < 0.05$

\*\* Statistical significance of  $p < 0.005$

Abbreviations: CI, confidence interval.
