# Supplementary material for: Long-term Bowel Dysfunction and Decline in Quality of Life Following Surgery for Colon Cancer: Call for Personalized Screening and Treatment
Source: PubMed Central journal article supplement (PMC9645552; doi:10.1097/dcr.0000000000002377), 2022-08-19
Supplement: dcr-65-1531-s005.pdf [file dcr-65-1531-s005.pdf]

**Supplemental Digital Content 4. Univariable and multivariable logistic regression analysis of constipation and fecal incontinence**

| Variables                                    | Constipation     |                |                  |                | Fecal incontinence |                |                  |                |
|----------------------------------------------|------------------|----------------|------------------|----------------|--------------------|----------------|------------------|----------------|
|                                              | Univariable      |                | Multivariable    |                | Univariable        |                | Multivariable    |                |
|                                              | OR (95% CI)      | <i>p</i> value | OR (95% CI)      | <i>p</i> value | OR (95% CI)        | <i>p</i> value | OR (95% CI)      | <i>p</i> value |
| <b>Type of colectomy</b>                     |                  |                |                  |                |                    |                |                  |                |
| Right hemicolectomy                          | Reference        |                | Reference        |                | Reference          |                | Reference        |                |
| Left hemicolectomy                           | 1.24 (0.81–1.89) | 0.326          | 1.54 (0.94–2.52) | 0.090          | 0.89 (0.57–1.39)   | 0.602          | 1.17 (0.72–1.91) | 0.532          |
| Sigmoid colon resection                      | 2.10 (1.52–2.90) | <0.001**       | 2.92 (1.80–4.75) | <0.001**       | 0.64 (0.43–0.95)   | 0.028*         | 0.77 (0.49–1.21) | 0.259          |
| <b>Sex</b>                                   |                  |                |                  |                |                    |                |                  |                |
| Men                                          | Reference        |                | Reference        |                | Reference          |                | Reference        |                |
| Women                                        | 1.39 (1.05–1.86) | 0.023*         | 1.43 (1.02–1.99) | 0.038*         | 1.45 (1.06–1.98)   | 0.021*         | 1.46 (1.03–2.07) | 0.036*         |
| <b>Age at surgery (years)</b>                | 1.02 (1.00–1.03) | 0.036*         | 1.02 (1.00–1.04) | 0.037*         | 1.01 (1.00–1.03)   | 0.150          | 1.02 (1.00–1.03) | 0.123          |
| <b>Follow-up (months)</b>                    | 1.00 (1.00–1.01) | 0.559          | 1.01 (1.00–1.02) | 0.050          | 1.00 (1.00–1.01)   | 0.348          | 1.01 (1.00–1.01) | 0.203          |
| <b>BMI at surgery (kg/m<sup>2</sup>)</b>     | 1.02 (0.99–1.06) | 0.162          | -                | -              | 1.01 (0.97–1.05)   | 0.631          | -                | -              |
| <b>ASA score at surgery</b>                  | 1.24 (0.98–1.55) | 0.068          | 1.26 (0.96–1.66) | 0.089          | 1.19 (0.93–1.53)   | 0.175          | -                | -              |
| <b>Charlson comorbidity index at surgery</b> | 1.09 (0.90–1.32) | 0.396          | -                | -              | 1.19 (0.97–1.46)   | 0.088          | 1.19 (0.95–1.48) | 0.128          |
| <b>Previous lower abdominal surgery</b>      |                  |                |                  |                |                    |                |                  |                |
| No                                           | Reference        |                | Reference        |                | Reference          |                | -                | -              |
| Yes                                          | 1.38 (1.02–1.85) | 0.035*         | 1.18 (0.84–1.66) | 0.333          | 1.30 (0.94–1.80)   | 0.110          | -                | -              |
| <b>Previous upper abdominal surgery</b>      |                  |                |                  |                |                    |                |                  |                |
| No                                           | Reference        |                | Reference        |                | Reference          |                | -                | -              |
| Yes                                          | 0.30 (0.13–0.71) | 0.006*         | 0.31 (0.13–0.75) | 0.009*         | 1.06 (0.57–1.98)   | 0.849          | -                | -              |

| Variables                            | Constipation     |                |                  |                | Fecal incontinence |                |                  |                |
|--------------------------------------|------------------|----------------|------------------|----------------|--------------------|----------------|------------------|----------------|
|                                      | Univariable      |                | Multivariable    |                | Univariable        |                | Multivariable    |                |
|                                      | OR (95% CI)      | <i>p</i> value | OR (95% CI)      | <i>p</i> value | OR (95% CI)        | <i>p</i> value | OR (95% CI)      | <i>p</i> value |
| <b>Smoking</b>                       |                  |                |                  |                |                    |                |                  |                |
| No                                   | Reference        |                | Reference        |                | Reference          |                | Reference        |                |
| Yes or recently quit                 | 0.66 (0.43–1.01) | 0.057          | 0.85 (0.54–1.34) | 0.484          | 1.52 (1.02–2.28)   | 0.039*         | 1.68 (1.10–2.56) | 0.017*         |
| <b>Tumor stage (UICC)</b>            |                  |                |                  |                |                    |                |                  |                |
| I - II                               | Reference        |                | -                | -              | Reference          |                | -                | -              |
| III - IV                             | 1.00 (0.74–1.35) | 0.992          | -                | -              | 1.03 (0.74–1.44)   | 0.856          | -                | -              |
| <b>Distant metastasis</b>            |                  |                |                  |                |                    |                |                  |                |
| No                                   | Reference        |                | -                | -              | Reference          |                | -                | -              |
| Yes                                  | 0.58 (0.27–1.24) | 0.160          | -                | -              | 1.35 (0.70–2.61)   | 0.371          | -                | -              |
| <b>Radiotherapy</b>                  |                  |                |                  |                |                    |                |                  |                |
| No                                   | Reference        |                | -                | -              | Reference          |                | Reference        |                |
| Yes                                  | 0.85 (0.32–2.29) | 0.754          | -                | -              | 2.28 (0.98–5.32)   | 0.057          | 2.92 (1.20–7.08) | 0.018*         |
| <b>Adjuvant chemotherapy</b>         |                  |                |                  |                |                    |                |                  |                |
| No                                   | Reference        |                | -                | -              | Reference          |                | -                | -              |
| Yes                                  | 0.94 (0.68–1.29) | 0.690          | -                | -              | 1.12 (0.80–1.58)   | 0.509          | -                | -              |
| <b>Type of chemotherapy</b>          |                  |                |                  |                |                    |                |                  |                |
| No                                   | Reference        |                | -                | -              | Reference          |                | -                | -              |
| CAPOX                                | 0.95 (0.63–1.44) | 0.803          | -                | -              | 0.95 (0.60–1.52)   | 0.829          | -                | -              |
| FOLFOX                               | 0.70 (0.41–1.22) | 0.208          | -                | -              | 1.33 (0.79–2.23)   | 0.280          | -                | -              |
| Capecitabine                         | 1.34 (0.73–2.44) | 0.341          | -                | -              | 1.20 (0.61–2.38)   | 0.601          | -                | -              |
| <b>Years since last chemotherapy</b> | 0.98 (0.90–1.07) | 0.654          | -                | -              | 1.04 (0.97–1.13)   | 0.269          | -                | -              |
| <b>Setting</b>                       |                  |                |                  |                |                    |                |                  |                |
| Elective                             | Reference        |                | -                | -              | Reference          |                | Reference        |                |
| Emergency                            | 1.32 (0.84–2.07) | 0.225          | -                | -              | 0.57 (0.31–1.05)   | 0.073          | 0.56 (0.27–1.14) | 0.108          |
| <b>Surgical approach</b>             |                  |                |                  |                |                    |                |                  |                |
| Open                                 | Reference        |                | Reference        |                | Reference          |                | -                | -              |
| Laparoscopic                         | 1.41 (1.0–1.90)  | 0.027*         | 1.35 (0.96–1.91) | 0.087          | 0.94 (0.67–1.31)   | 0.698          | -                | -              |
| Conversion                           | 1.34 (0.80–2.24) | 0.263          | 1.45 (0.81–2.58) | 0.207          | 1.03 (0.58–1.81)   | 0.922          | -                | -              |

| Variables                    | Constipation     |                |                  |                | Fecal incontinence |                |                  |                |
|------------------------------|------------------|----------------|------------------|----------------|--------------------|----------------|------------------|----------------|
|                              | Univariable      |                | Multivariable    |                | Univariable        |                | Multivariable    |                |
|                              | OR (95% CI)      | <i>p</i> value | OR (95% CI)      | <i>p</i> value | OR (95% CI)        | <i>p</i> value | OR (95% CI)      | <i>p</i> value |
| <b>Method of anastomosis</b> |                  |                |                  |                |                    |                |                  |                |
| Handsewn                     | Reference        |                | -                | -              | Reference          |                | -                | -              |
| Stapled                      | 1.11 (0.83–1.49) | 0.488          |                  |                | 0.77 (0.56–1.08)   | 0.127          |                  |                |
| <b>Type of anastomosis</b>   |                  |                |                  |                |                    |                |                  |                |
| Side-to-end                  | Reference        |                | Reference        |                | Reference          |                | -                | -              |
| Side-to-side                 | 0.58 (0.40–0.85) | 0.005**        | 1.09 (0.65–1.84) | 0.734          | 1.05 (0.67–1.65)   | 0.816          |                  |                |
| End-to-end                   | 0.66 (0.39–1.12) | 0.120          | 0.89 (0.49–1.61) | 0.697          | 0.91 (0.49–1.69)   | 0.769          |                  |                |
| <b>Temporary stoma</b>       |                  |                |                  |                |                    |                |                  |                |
| No                           | Reference        |                | -                | -              | Reference          |                | Reference        |                |
| Yes                          | 1.17 (0.68–2.00) | 0.571          |                  |                | 0.46 (0.21–1.02)   | 0.056          | 0.76 (0.32–1.79) | 0.758          |
| <b>Anastomotic leakage</b>   |                  |                |                  |                |                    |                |                  |                |
| No                           | Reference        |                | -                | -              | Reference          |                | -                | -              |
| Yes                          | 1.19 (0.61–2.32) | 0.606          |                  |                | 1.12 (0.54–2.35)   | 0.760          |                  |                |
| <b>Reoperation</b>           |                  |                |                  |                |                    |                |                  |                |
| No                           | Reference        |                | -                | -              | Reference          |                | -                | -              |
| Yes                          | 1.21 (0.72–2.05) | 0.472          |                  |                | 1.12 (0.63–2.01)   | 0.702          |                  |                |

\* Statistical significance of  $p < 0.05$

\*\* Statistical significance of  $p < 0.005$

Abbreviations: CI, Confidence Interval; ASA, American Society of Anesthesiologists; UICC, Union for International Cancer Control.
