# Supplementary material for: Long-term Bowel Dysfunction and Decline in Quality of Life Following Surgery for Colon Cancer: Call for Personalized Screening and Treatment
Source: PubMed Central journal article supplement (PMC9645552; doi:10.1097/dcr.0000000000002377), 2022-08-19

**Supplemental Digital Content 5. Generic quality of life scores of all patients without fecal incontinence according to the type of colon resection**

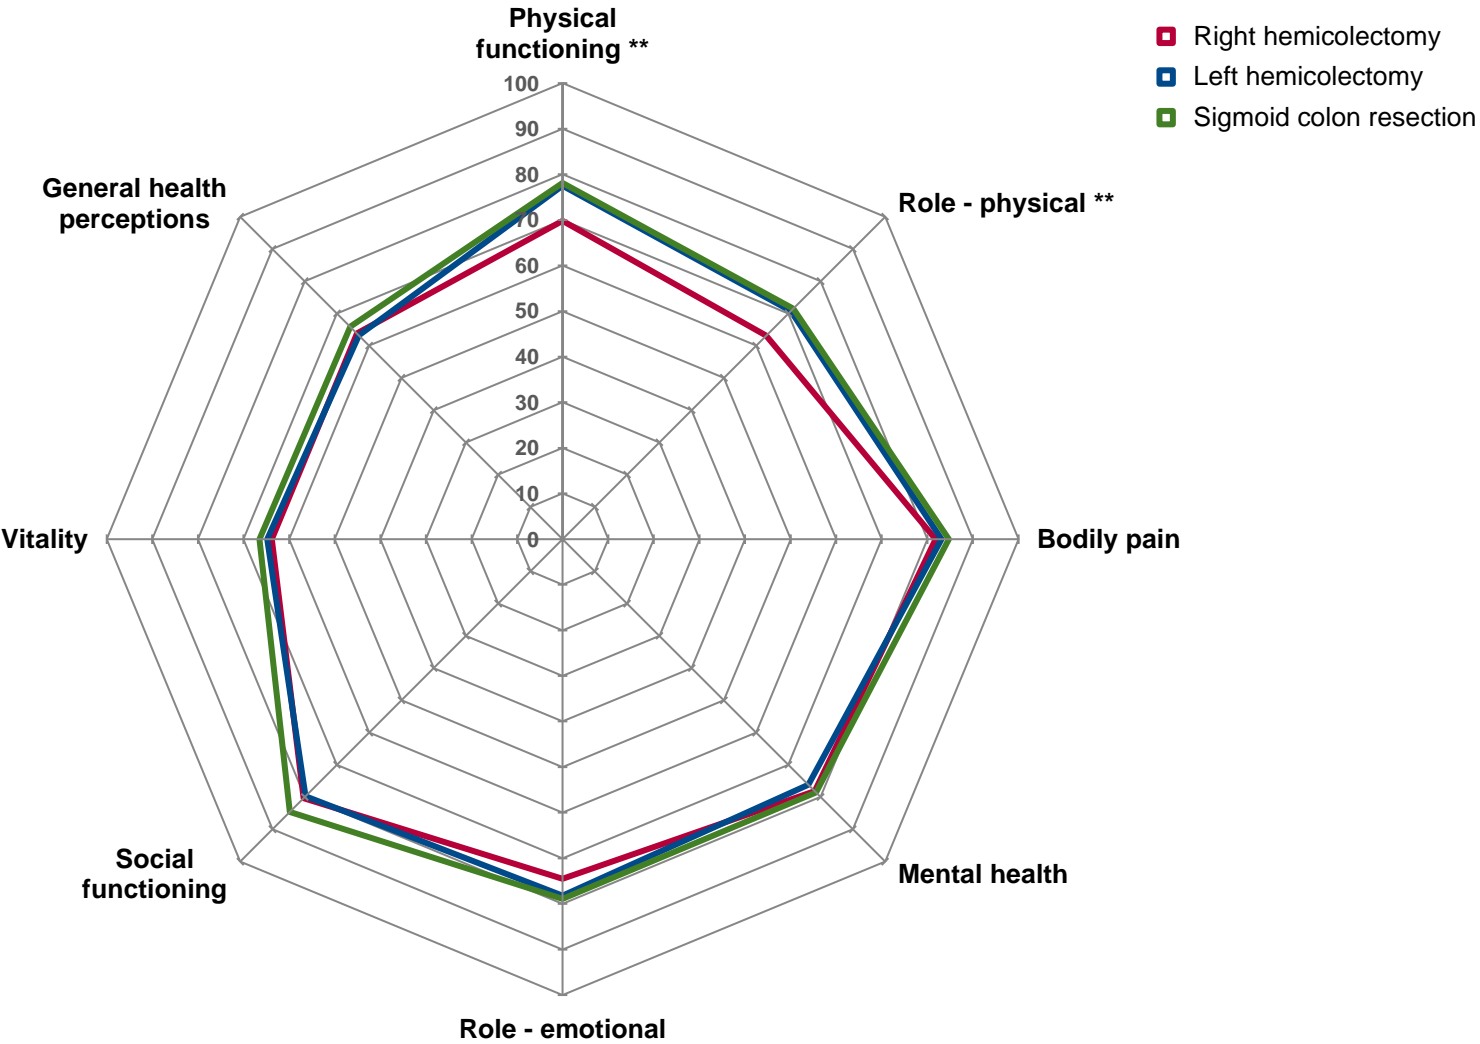

Supplement: dcr-65-1531-s006.pdf [file dcr-65-1531-s006.pdf]
